# Supplementary material for: Effectiveness of Cymbopogon citratus Oil Encapsulated in Chitosan on Colletotrichum gloeosporioides Isolated from Capsicum annuum
Source: MDPI journal article supplement (doi:10.3390/molecules25194447), 2020-09-28

**1. Antifungal activity of chitosan-agar-EO capsules of *C. Citratus* against *C. gloeosporioides***

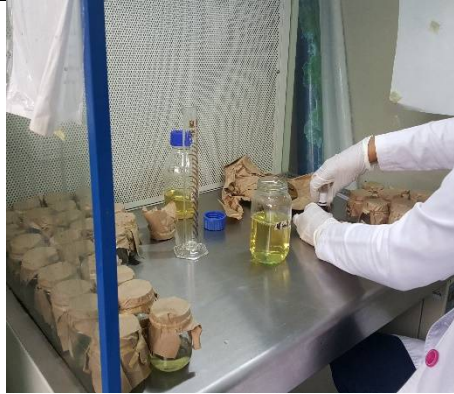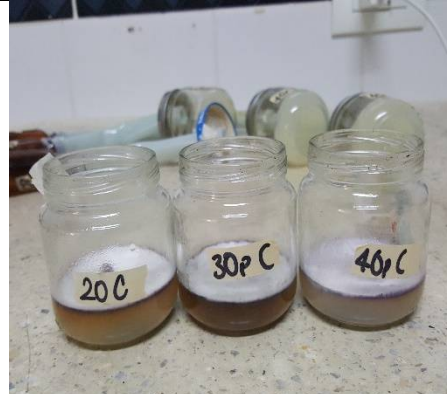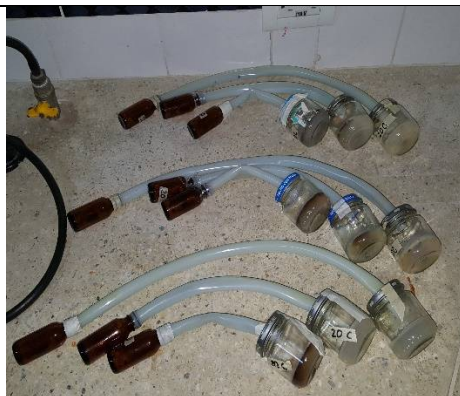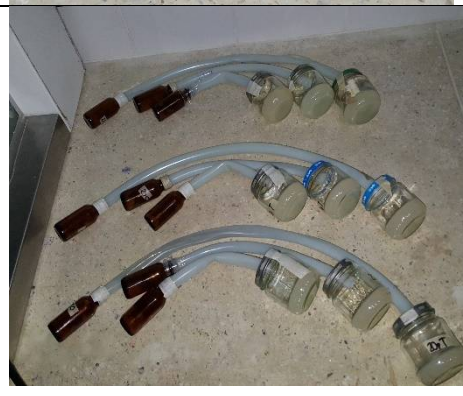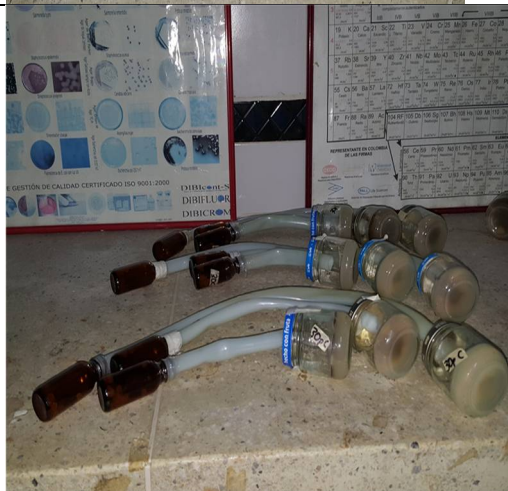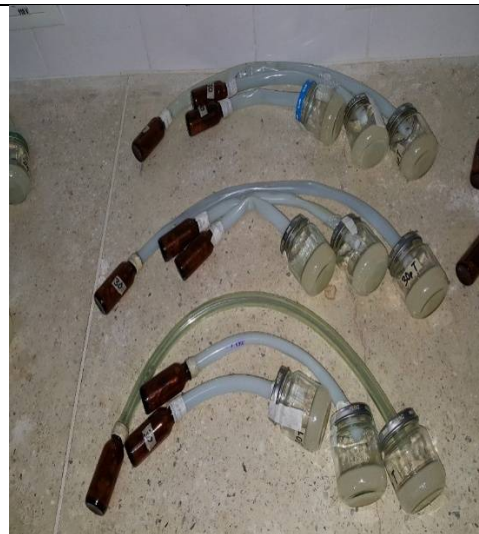

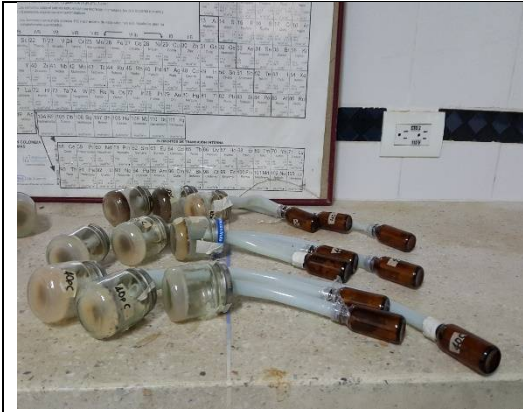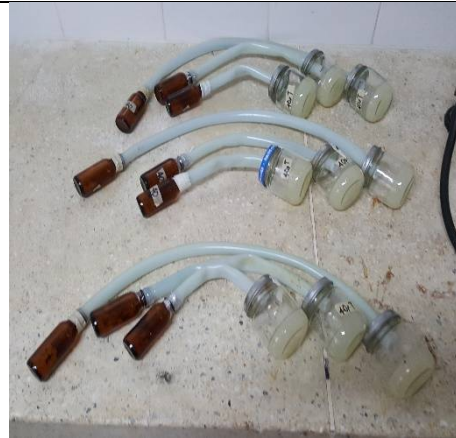

## 2. Reinoculation

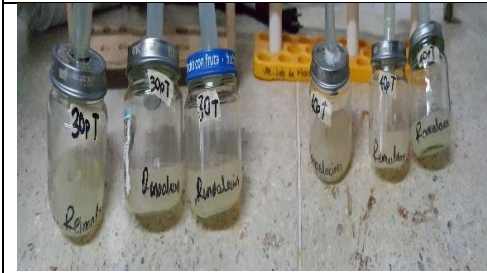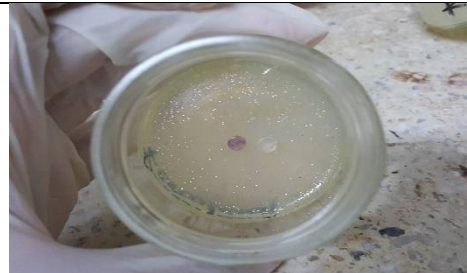

Supplement: s1 [file s1]
