# Supplementary material for: Effectiveness of Cymbopogon citratus Oil Encapsulated in Chitosan on Colletotrichum gloeosporioides Isolated from Capsicum annuum
Source: MDPI journal article supplement (doi:10.3390/molecules25194447), 2020-09-28
Supplement: s1 [file s1]

## SPSS statistical analysis results

lcm

Tukey HSD

| treatment | N | Subset for alpha = 0.05 |         |         |         |          |
|-----------|---|-------------------------|---------|---------|---------|----------|
|           |   | 1                       | 2       | 3       | 4       | 5        |
| 10.00     | 3 | .0000                   | 43.0000 | 49.7000 | 53.9000 | 100.0000 |
| 11.00     | 3 | .0000                   |         |         |         |          |
| 12.00     | 3 | .0000                   |         |         |         |          |
| 13.00     | 3 | .0000                   |         |         |         |          |
| 14.00     | 3 | .0000                   |         |         |         |          |
| 15.00     | 3 | .0000                   |         |         |         |          |
| 16.00     | 3 | .0000                   |         |         |         |          |
| 17.00     | 3 | .0000                   |         |         |         |          |
| 18.00     | 3 | .0000                   |         |         |         |          |
| 7.00      | 3 |                         |         | 49.7000 | 53.9000 |          |
| 4.00      | 3 |                         |         |         |         |          |
| 1.00      | 3 |                         |         |         |         |          |
| 2.00      | 3 |                         |         |         |         |          |
| 3.00      | 3 |                         |         |         |         |          |
| 5.00      | 3 |                         |         |         |         |          |
| 6.00      | 3 |                         |         |         |         |          |
| 8.00      | 3 |                         |         |         |         |          |
| 9.00      | 3 |                         |         |         |         |          |
| Sig.      |   | 1.000                   | 1.000   | 1.000   | 1.000   | 1.000    |

Averages for groups in homogeneous subsets are displayed.

a. Uses Harmonic Mean Sample Size = 3.000.

**Day 5**

Tukey HSD

| treatment | N | Subset for alpha = 0.05 |                    |         |          |
|-----------|---|-------------------------|--------------------|---------|----------|
|           |   | 1                       | 2                  | 3       | 4        |
| 3         | 3 | .0000                   | 11.1100<br>11.5233 | 22.6333 | 100.0000 |
| 4         | 3 |                         |                    |         |          |
| 1         | 3 |                         |                    |         |          |
| 2         | 3 |                         |                    | 22.6333 | 100.0000 |
| 0         | 3 |                         |                    |         |          |
| Sig.      |   | 1.000                   | .794               | 1.000   | 1.000    |

Averages for groups in homogeneous subsets are displayed.

a. Uses Harmonic Mean Sample Size = 3.000.

### day10

Tukey HSD

| treatment | N | Subset for alpha = 0.05 |        |         |         |          |
|-----------|---|-------------------------|--------|---------|---------|----------|
|           |   | 1                       | 2      | 3       | 4       | 5        |
| 3         | 3 | .0000                   | 9.0533 | 31.3700 | 38.8233 | 100.0000 |
| 4         | 3 |                         |        |         |         |          |
| 1         | 3 |                         |        |         |         |          |
| 2         | 3 |                         |        |         |         |          |
| 0         | 3 |                         |        |         |         |          |
| Sig.      |   | 1.000                   | 1.000  | 1.000   | 1.000   | 1.000    |

Averages for groups in homogeneous subsets are displayed.

a. Uses Harmonic Mean Sample Size = 3.000.

### Day 15

Tukey HSD

| treatment | N | Subset for alpha = 0.05 |        |         |         |          |
|-----------|---|-------------------------|--------|---------|---------|----------|
|           |   | 1                       | 2      | 3       | 4       | 5        |
| 3         | 3 | .0000                   | 3.7000 | 50.9767 | 69.4133 | 100.0000 |
| 4         | 3 |                         |        |         |         |          |
| 2         | 3 |                         |        |         |         |          |
| 1         | 3 |                         |        |         |         |          |
| 0         | 3 |                         |        |         |         |          |
| Sig.      |   | 1.000                   | 1.000  | 1.000   | 1.000   | 1.000    |

Averages for groups in homogeneous subsets are displayed.

a. Uses Harmonic Mean Sample Size = 3.000.

### Day 30

Tukey HSD

| treatment | N | Subset for alpha = 0.05 |        |         |
|-----------|---|-------------------------|--------|---------|
|           |   | 1                       | 2      | 3       |
| 3         | 3 | .0000                   | 3.7000 | 99.6667 |
| 4         | 3 |                         |        |         |
| 1         | 3 |                         |        |         |
| 2         | 3 |                         |        |         |
| 0         | 3 |                         |        |         |
| Sig.      |   | 1.000                   | 1.000  | .794    |

Averages for groups in homogeneous subsets are displayed.

a. Uses Harmonic Mean Sample Size = 3.000.
