# Supplementary material for: Effectiveness of Cymbopogon citratus Oil Encapsulated in Chitosan on Colletotrichum gloeosporioides Isolated from Capsicum annuum
Source: MDPI journal article supplement (doi:10.3390/molecules25194447), 2020-09-28

1. Reactivation of the pathogen was carried out using agar-sweet pepper (macerated plant material added to agar-agar)

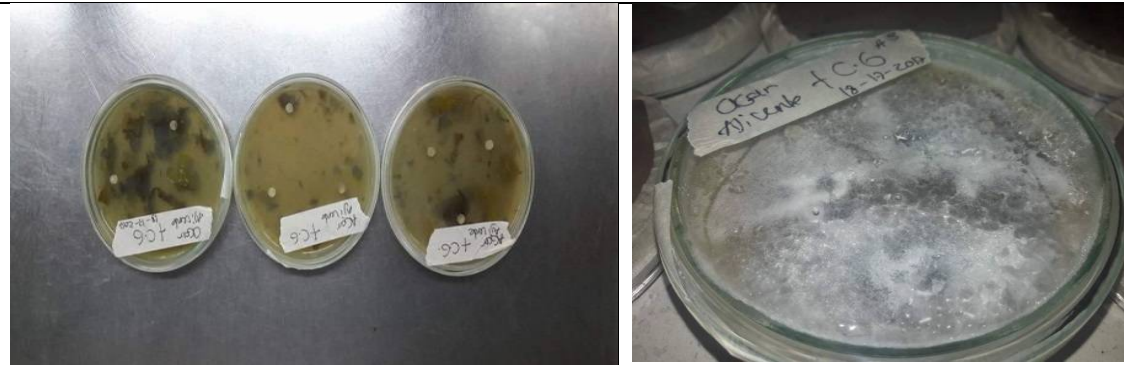

2. Virulence of strains isolated from *C. gloeosporioides* were assessed using wet chamber mounts.

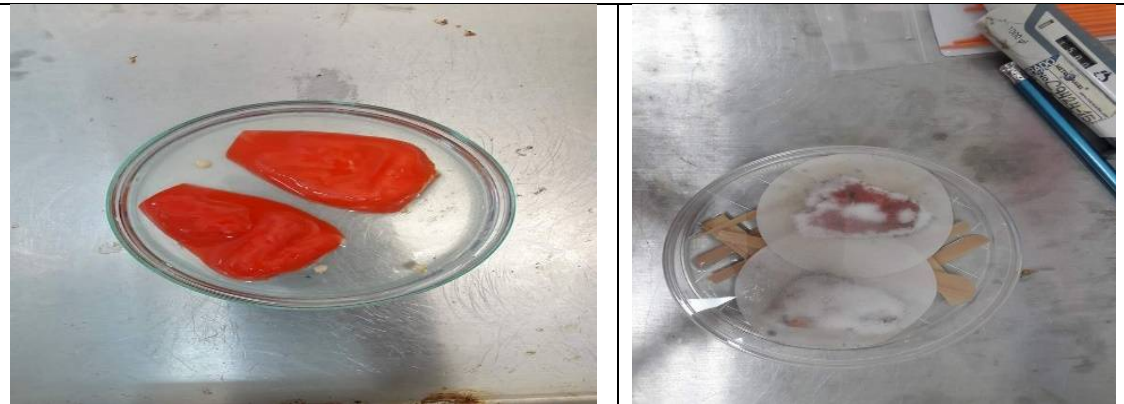

Supplement: s1 [file s1]
