# Supplementary material for: Effectiveness of Cymbopogon citratus Oil Encapsulated in Chitosan on Colletotrichum gloeosporioides Isolated from Capsicum annuum
Source: MDPI journal article supplement (doi:10.3390/molecules25194447), 2020-09-28

## 1. Preparation and characterization of the chitosan capsules

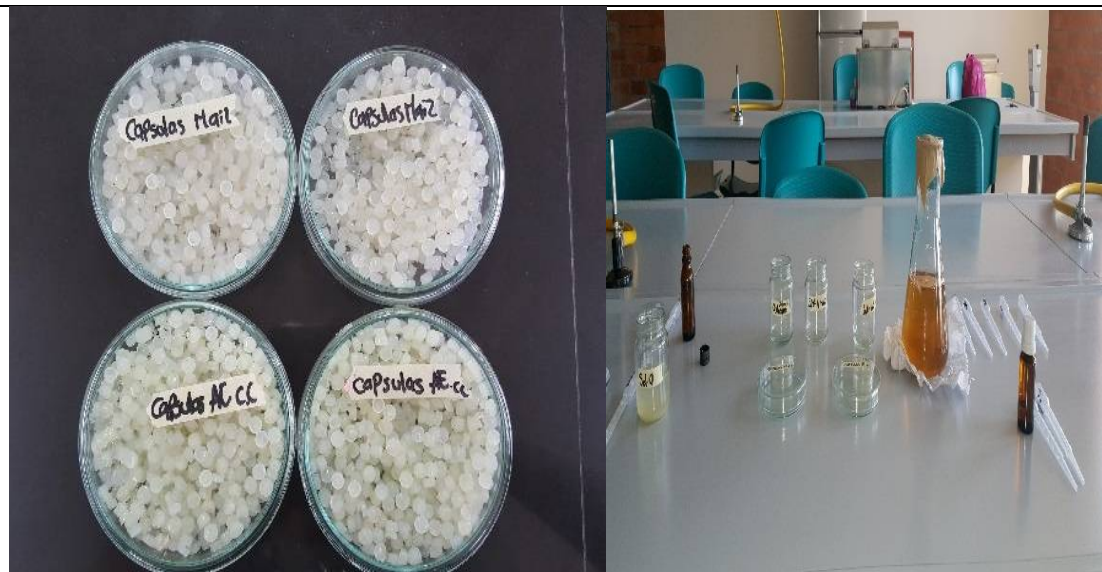

## 2. Evaluation of the antifungal activity of chitosan against *C. gloeosporioides*

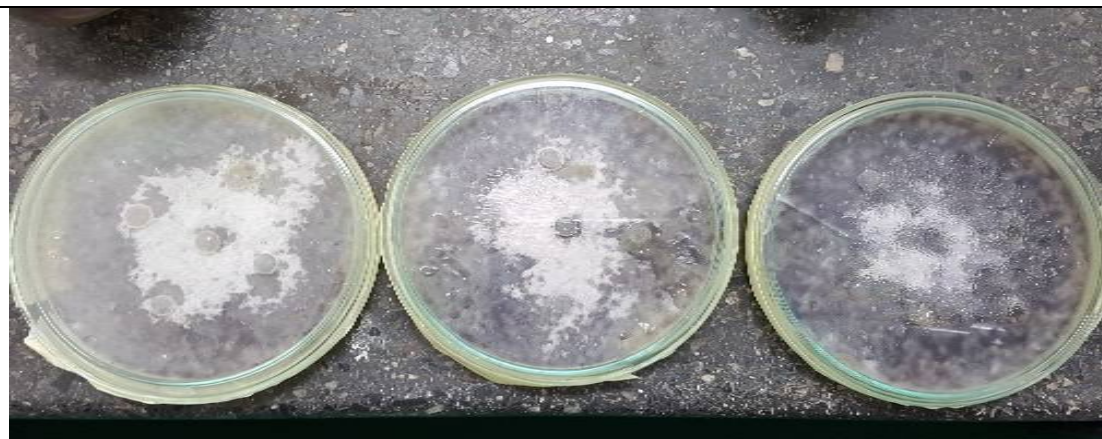

Supplement: s1 [file s1]
