# Supplementary material for: Effectiveness of Cymbopogon citratus Oil Encapsulated in Chitosan on Colletotrichum gloeosporioides Isolated from Capsicum annuum
Source: MDPI journal article supplement (doi:10.3390/molecules25194447), 2020-09-28
Supplement: s1 [file s1]

Figure 1. Blast in the NCBI for the isolation code 002

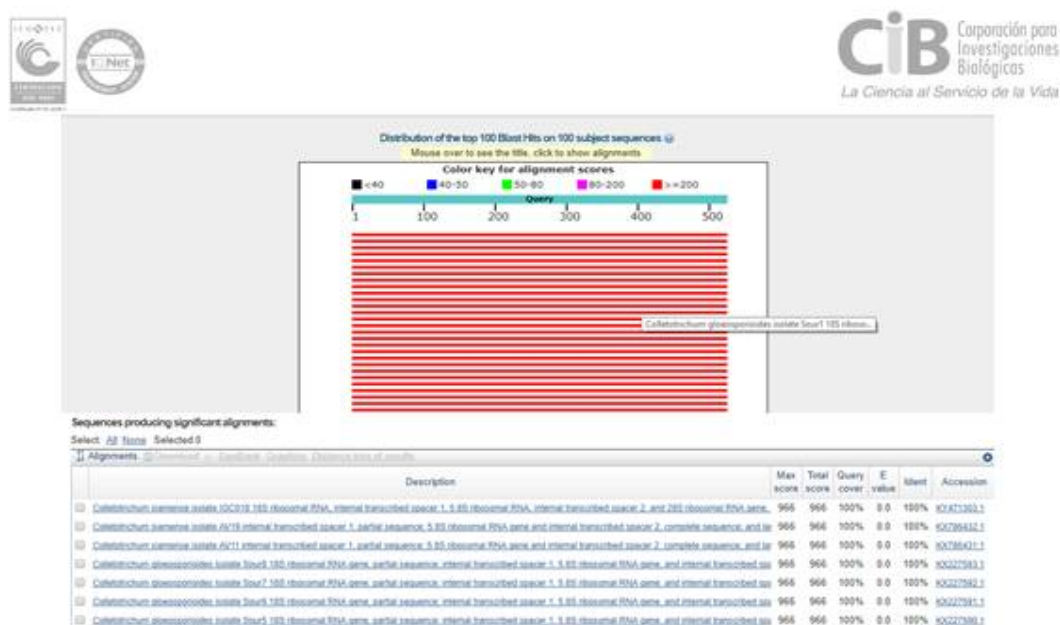

**Figura 1.** BLAST en el NCBI para el aislamiento Cód. 002.

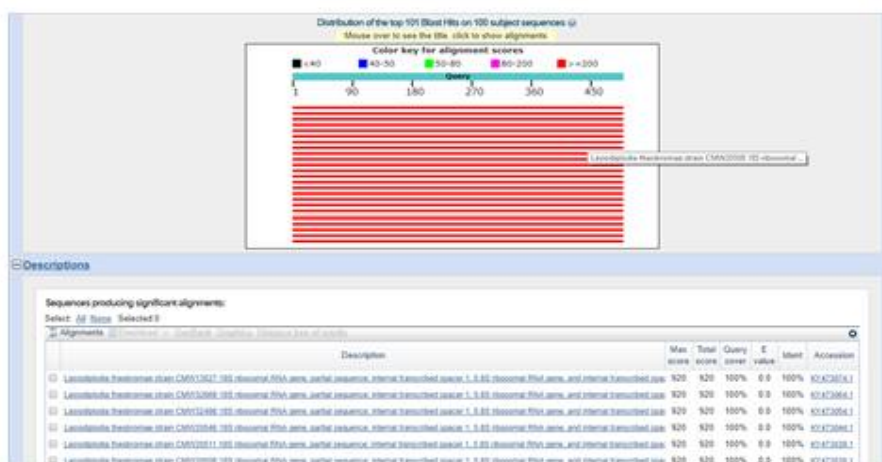

**Figura 2.** BLAST en el NCBI para el aislamiento Cód. 003.

Carrera 72A No 78B – 141 / Tel: (4) 605 18 08  
<http://www.cib.org.co> / e-mail: [cib@cib.org.co](mailto:cib@cib.org.co) / A.A 7378 / Medellín-Colombia

Figure 2. Blast in the NCBI for the isolation code 003
